# Supplementary material for: An efficient LiSrGaF6:Cr3+ fluoride phosphor with broadband NIR emission towards sunlight-like full-spectrum lighting
Source: Royal Society of Chemistry journal article supplement (doi:10.1039/d3dt01996a), 2023-01-01
Supplement: d3dt01996a1.pdf [file d3dt01996a1.pdf]

## Electronic Supplementary Information

### **An efficient LiSrGaF<sub>6</sub>: Cr<sup>3+</sup> fluoride phosphor with broadband NIR emission towards sunlight-like full-spectrum lighting**

Di Wu <sup>a,b,c</sup>, Yan Li <sup>a,d</sup>, Yu Liao <sup>a,d</sup>, Xixiang Pan <sup>a,c</sup>, Songbin Liu<sup>a,d,e\*</sup>, Wanfang Zou <sup>a,d</sup>, Jiaqing Peng  
<sup>a,d,e\*</sup>, Xinyu Ye<sup>a,c,d,e\*</sup>

<sup>a</sup> Faculty of Materials Metallurgy and Chemistry, Collage of Rare earth, Jiangxi University of Science and Technology, Ganzhou 341000, P.R.China

<sup>b</sup> School of Materials Science and Engineering, Peking University, Beijing 100083, P.R.China

<sup>c</sup> National Engineering Research Center for Ionic Rare Earth, Ganzhou, 341000, PR China

<sup>d</sup> Key Laboratory of Rare Earth Luminescence Materials and Devices of Jiangxi Province, Ganzhou 341000, P.R.China

<sup>e</sup> National Rare Earth Functional Materials Innovation Centre, Ganzhou, 341000, PR China, Ganzhou, 341000, P.R. China

\* Corresponding authors: [songbliu@jxust.edu.cn](mailto:songbliu@jxust.edu.cn) (S. Liu); [jiaqpeng@hotmail.com](mailto:jiaqpeng@hotmail.com) (J. Peng); [ye\\_xin\\_yu@126.com](mailto:ye_xin_yu@126.com) (X. Ye)

**Table S1** Crystallographic data determined from the Rietveld refinement for  $\text{LiSrGa}_{0.6}\text{F}_6: 0.4\text{Cr}^{3+}$  and  $\text{LiSrGaF}_6$  host.

| Formula                        | $\text{LiSrGa}_{0.6}\text{F}_6: 0.4\text{Cr}^{3+}$ | $\text{LiSrGaF}_6$ |
|--------------------------------|----------------------------------------------------|--------------------|
| Crystal system                 | Hexagonal                                          | Hexagonal          |
| Space group                    | $P-31c$                                            | $P-31c$            |
| $a(\text{\AA})$                | 5.1516(8)                                          | 5.1566             |
| $b(\text{\AA})$                | 5.1516(8)                                          | 5.1566             |
| $c(\text{\AA})$                | 10.3174(9)                                         | 10.3176            |
| $V(\text{\AA}^3)$              | 237.14                                             | 237.59             |
| $\alpha, \beta, \gamma$ (deg.) | 90, 90, 120                                        | 90, 90, 120        |
| $R_{wp}(\%)$                   | 5.71%                                              | -                  |
| $R_p(\%)$                      | 3.91%                                              | -                  |
| $\chi^2$                       | 4.687                                              | -                  |

**Table S2** The photoelectric efficiency of NIR phosphors.

| Phosphor                                                         | Current (mA) | NIR output power (mW) | Photoelectric efficiency (%) | Reference |
|------------------------------------------------------------------|--------------|-----------------------|------------------------------|-----------|
| $\text{Ga}_{2-x}\text{Sc}_x\text{O}_3: \text{Cr}^{3+}$           | 350          | 66.09                 | 6.57                         | [1]       |
| $\text{LiScP}_2\text{O}_7: \text{Cr}^{3+}, \text{Yb}^{3+}$       | 100          | 36                    | 12                           | [2]       |
| $\text{Ca}_3\text{Sc}_2\text{Si}_3\text{O}_{12}: \text{Cr}^{3+}$ | 520          | 109.9                 | 3.8                          | [3]       |
| $\text{ScF}_3: \text{Cr}^{3+}$                                   | 300          | 24.15                 | 2.54                         | [4]       |
| $\text{K}_3\text{AlF}_6: \text{Cr}^{3+}$                         | 350          | 7                     | 0.7                          | [5]       |
| $\text{K}_3\text{GaF}_6: \text{Cr}^{3+}$                         | 350          | 8.4                   | 0.7                          | [5]       |
| $\text{K}_3\text{ScF}_6: \text{Cr}^{3+}$                         | 300          | 75.69                 | 7.955                        | [6]       |
| $\text{LiCaAlF}_6: \text{Cr}^{3+}$                               | 300          | 48.52                 | 5.002                        | [7]       |
| $\text{LiSrAlF}_6: \text{Cr}^{3+}$                               | 300          | 54.68                 | 5.468                        | [7]       |
| $\text{LiSrGaF}_6: \text{Cr}^{3+}$                               | 350          | 120.01                | 8.96                         | This work |

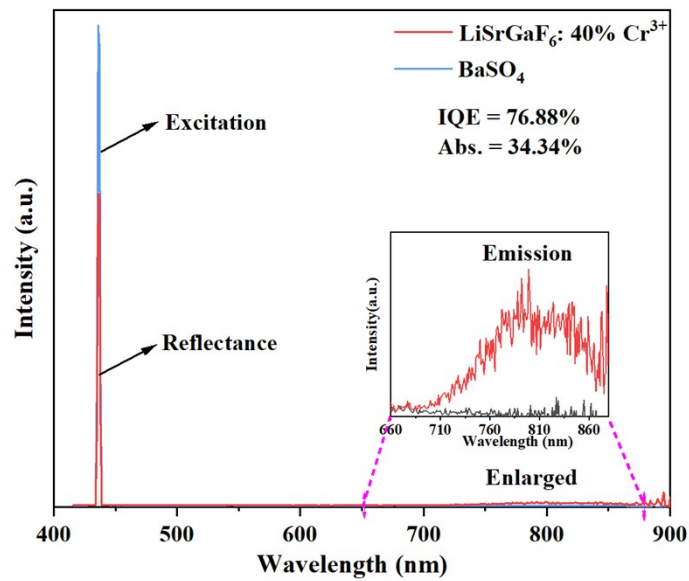

**Fig. S1** The internal quantum efficiency and absorption efficiency of  $\text{LiSrGa}_{0.6}\text{F}_6: 0.4\text{Cr}^{3+}$  sample.

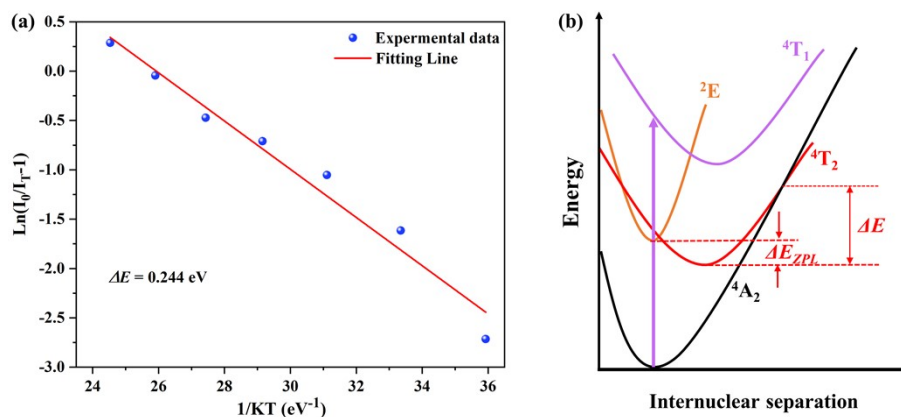

**Fig. S2** (a) Fitted activation energy of  $\text{LiSrGa}_{0.6}\text{F}_6: 0.4\text{Cr}^{3+}$  sample. (b) Configurational coordinate diagram of  $\text{LiSrGaF}_6: \text{Cr}^{3+}$ .

#### Reference:

- [1] M.-H. Fang, K.-C. Chen, N. Majewska, T. Leśniewski, S. Mahlik, G. Leniec, S. M. Kaczmarek, C.-W. Yang, K.-M. Lu, H.-S. Sheu and R.-S. Liu, *ACS Energy Lett.*, 2021, **6**, 109-114.
- [2] L. Yao, Q. Shao, S. Han, C. Liang, J. He and J. Jiang, *Chem. Mater.*, 2020, **32**, 2430-2439.
- [3] Z. Jia, C. Yuan, Y. Liu, X.-J. Wang, P. Sun, L. Wang, H. Jiang and J. Jiang, *Light: Sci. Appl.*, 2020, **9**, 86.
- [4] Q. Lin, Q. Wang, M. Liao, M. Xiong, X. Feng, X. Zhang, H. Dong, D. Zhu, F. Wu and Z. Mu, *ACS Appl. Mater. Interfaces*, 2021, **13**, 18274-18282.
- [5] C. Lee, Z. Bao, M.-H. Fang, T. Lesniewski, S. Mahlik, M. Grinberg, G. Leniec, S. M. Kaczmarek, M. G. Brik, Y.-T. Tsai, T.-L. Tsai and R.-S. Liu, *Inorg. Chem.*, 2020, **59**, 376-385.
- [6] H. Yu, J. Chen, R. Mi, J. Yang and Y.-g. Liu, *Chem. Eng. J.*, 2021, **417**, 129271.
- [7] D. Wu, L. Liu, H. Liang, H. Duan, W. Nie, J. Wang, J. Peng and X. Ye, *Ceram. Int.*, 2022, **48**, 387-396.
